# Supplementary material
Source: PubMed Central journal article supplement (PMC5363191)
Supplement: mmc1.pdf [file mmc1.pdf]

**YMTHE, Volume 25**

## **Supplemental Information**

### **Engineering HIV-Resistant, Anti-HIV Chimeric**

### **Antigen Receptor T Cells**

**Malika Hale, Taylor Mesojednik, Guillermo S. Romano Ibarra, Jaya Sahni, Alison Bernard, Karen Sommer, Andrew M. Scharenberg, David J. Rawlings, and Thor A. Wagner**

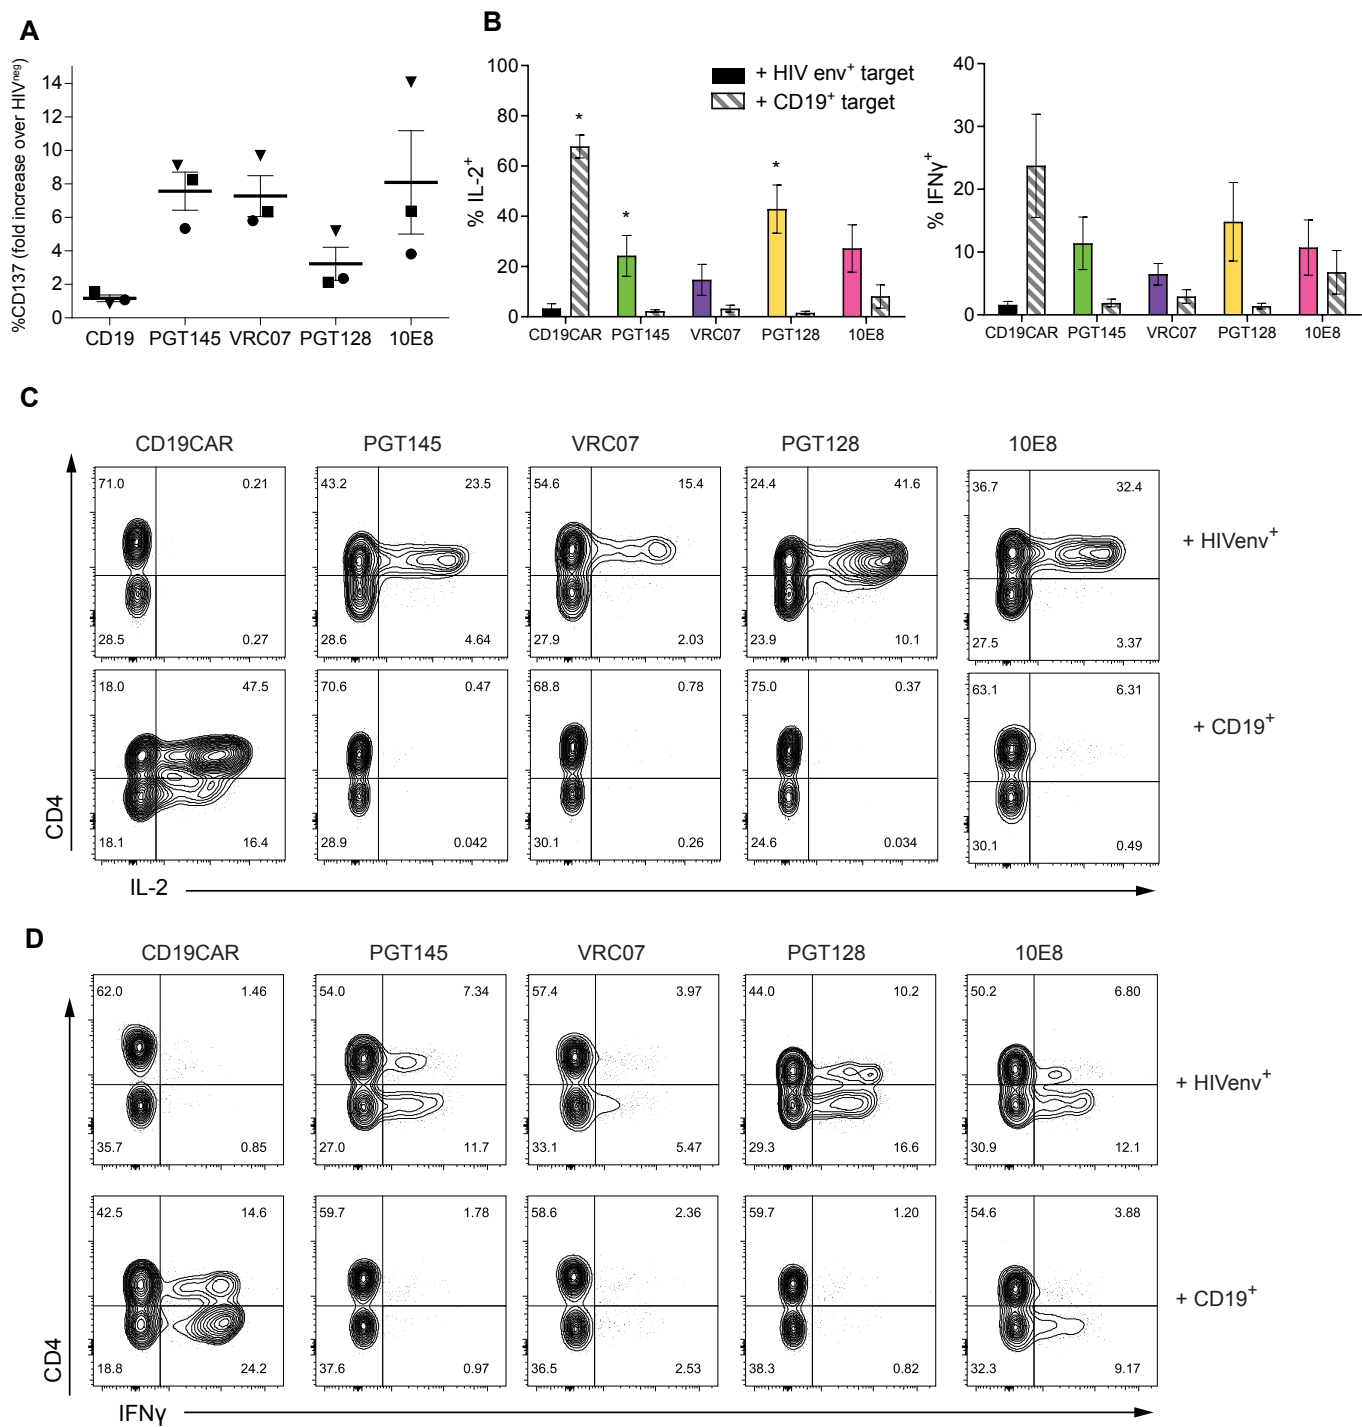

**Figure S1. HIVCAR T cells derived from multiple donors activate in the presence of HIV-infected cells and produce cytokines in the presence of HIV envelope-expressing cells.** (a) Fold change in the % of CAR T cells expressing CD137 24 hours post-stimulation with HIV<sup>pos</sup> or HIV<sup>neg</sup> cells. The three donors used to generate HIVCAR T cells are designated by data point shape. (b) Percent of BFP<sup>+</sup> CAR T cells expressing IFN $\gamma$  and IL-2 by intracellular staining in the presence of a K562 cell line transiently transfected with HIV envelope cis-linked to a GFP (“HIV env<sup>+</sup> target”), or K562 expressing CD19 cis-linked to GFP as a control (“CD19<sup>+</sup> target”; previously described<sup>1</sup>). A plasmid encoding the TRO11 HIV envelope was obtained through the NIH AIDS Reagent Program, Division of AIDS, NIAID, NIH from Drs. Feng Gao and David Montefiori (cat #11023).<sup>2,3</sup> The envelope sequence was amplified by PCR and cloned downstream of the T7 promoter and upstream of a T2A GFP in a pWNY vector<sup>4</sup> by InFusion (Clontech) cloning. mRNA was produced using the mScript T7 standard RNA production kit (Cellscript) as described.<sup>1</sup> To generate HIV env<sup>+</sup> target cells,  $2.5 \times 10^6$  K562 cells were transfected with  $12 \mu\text{g}$  pWNY.TRO11.T2A.GFP mRNA using a Neon Transfection System at 1400 volts, 10 ms pulse width for 3 pulses. 24 hours post-transfection,  $1.5 \times 10^5$  HIV env<sup>+</sup> target K562 or CD19<sup>+</sup> target K562 were mixed with  $7.5 \times 10^4$  CAR T cells and resuspended in  $200 \mu\text{L}$  T cell media with  $1 \mu\text{L}/\text{mL}$  GolgiPlug (BD Biosciences) in a 96 well-plate. Cells were incubated in a humidified environment at  $37^\circ\text{C}$  with  $5\% \text{CO}_2$  for 6 hours, and then washed twice in PBS and stained for human CD4 (PerCP/Cy5.5; BioLegend), followed by fixation and permeabilization using BD Cytfix/Cytoperm and stained with anti-human IFN $\gamma$  (Alexa647; BioLegend) and IL-2 (PE-Cy7; Affymetrix) antibodies for flow cytometry analysis. Error bars reflect standard error in replicate experiments using CAR T cells generated from three donors. \*:  $p < .05$  in unpaired t-test with Holm-Sidak correction for multiple comparisons. Representative flow plots show CD4 expression and intracellular IL-2 (c) and IFN $\gamma$  (d) in BFP<sup>+</sup> CAR T cells after stimulation with HIV env<sup>+</sup> or CD19<sup>+</sup> target K562 cells. The CD4<sup>+</sup> fraction shown consists of CD8<sup>+</sup> T cells. Across three donors (donors 1 and 2 are displayed in c and d respectively) 60-70% of CAR T cells are CD4<sup>+</sup> in these assays.

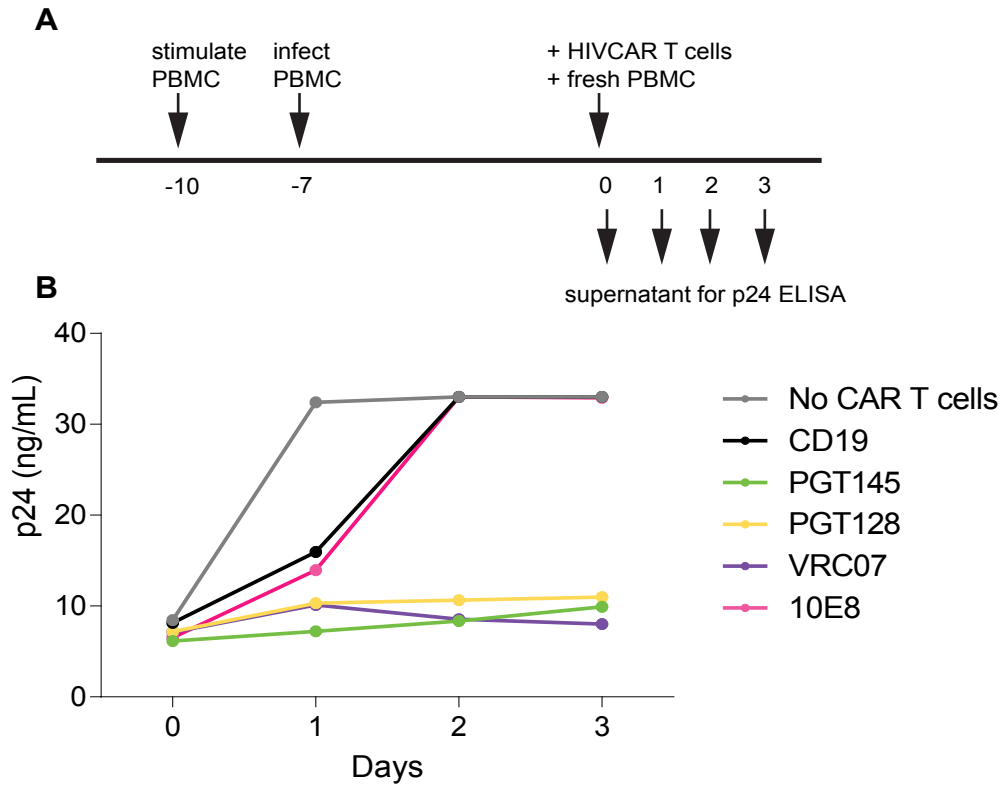

**Figure S2. 3 of 4 candidate HIVCARs control active infection of PBMC**

(a) Live virus challenge comparing HIVCAR T cells derived from alternative bNAbs in a 3 day-co-culture with infected and feeder PBMC. Assay was performed as described in Figure 4, except that infected PBMC were grown for 7 days prior to addition of CAR T cells, and co-cultures were established using the addition of freshly PHA-stimulated uninfected PBMC in association with CAR T cells (at a 1:1:1 ratio). A 75  $\mu$ L sample of supernatant was frozen 1 hour after the start of co-culture and every 24 hours for the duration of the assay. (b) p24 concentration in supernatant by ELISA plotted over time.

### Figure S3. Synthesized sequences for bNAb-derived scFv

PGT145: GAAGTCGTGATTACTCAGAGCCCACTGTTCTGCCCGTGACACCTGGCGAAGCCGCATCCCTGTCTTGCAAATGTTCCCATTCCTGCAG-  
CACTCTACTGGCGCCAACTATCTGGCTTGGTACTTGCAGAGACCCGGCCAGACTCCTCGGCTGCTGATCCACTGGCAACCCATAGAGCCAGTGGCGT-  
GCCAGACAGGTTCTCTGGCAGTGGGTTCAGGAAGTATTTTACCCTGAAGATTTACGCGTGGAGAGCGACGATGTCGGCACATACTATTGCATGCAG-  
GGGCTGCATAGCCCTGGACCTTCGGCCAGGGGACAAAGGTGGAATCAAACGAAGTGGCGGGGAGGCTCAGGAGGAGGAGGGAGCGGAG-  
GAGGAGGCAGCCAGGTGCAGCTGGTCCAGAGCGGAGCAGAGGTGAAGAACTGGCAGCTCCGTGAAGGTCTCCTGTAAGGCCAGCGGGAA-  
CAGCTTCTCCAATCACGATGTCCATTGGGTTCAGGCAGGCAACAGGACAGGGCCTGGAGTGGATGGGTGGATGTCCCAGAAAGGGGACAAGACT-  
GGACTGGCACAGAAATTTAGGGGAGGGTACCATCACACGCGATTCTGGAGCTAGTACCGTCTATATGGAGCTGCGGGGACTGACAGCTGACGA-  
TACTGCAATCTACTATTGCCTGACAGGCTCTAAACATCGGCTGAGAGATTCTTCTGTATAACGAATACGGCCCAATTACGAGGAATGGGGAGAT-  
TACCTGGCAACCCTGGATGTCTGGGGACACGGAACCGCAGTCACAGTCAGCTCA

VRC07-523: TCCCTGACCCAGTCCCCTGGCACCCCTGTCCCTGTCCCTGGCGAAACCGCAATCATCTCCTGTAGAACCCTCAGTACGGCTCTCTGG-  
CCTGGTATCAGCAGAGGCCCGCCAGGCCCAAGGCTGGTAATCTACAGCGGCTCCACAAGGGCCGCGGCATCCCAGATAGGTTCTCCGGCAG-  
CAGATGGGGCCCCGATTACAACCTGACAATCTCAACCTGGAGTCTGGCGATTTCCGGCTGTATTACTGTCAGCAGTACGAGTTTTTTCGGCCAGGGCA-  
CAAAGGTGCAAGTGGATATCAAGGGCGGCGGCGGCTCTGGCGGCGGCGGCGAGCGGCGGCGGCTCCAGGTGCGCTGTCTCAGTCCGGCGG-  
CCAGATGAAGAAGCCCGGCGATAGCATGAGAATCTCCTGTAGAGCCTCTGGCTACGAGTTTATCAACTGCCAATCAACTGGATCAGACTGGCCCTG-  
GCAAGAGACCTGAGTGGATGGGCTGGATGAAGCCAAGAGGCGGCGGCTTACGCCAGACAGCTGCAGGGCAGGGTGACAATGACACGGGA-  
TATGTACTCCGAGACAGCCTTCTGGAGCTGAGGTCCCTGACAAGCGACGATACAGCCGTGTATTTCTGCACACGGGGCAAGTATTGCACCGCCCCG-  
GATTACTATAACTGGGATTCGAGCATTGGGGGAGGGCACACCCGTGACTGTCTCAAGT

PGT128: CAGAGCGCCCTGACACAGCCCCCTCTGCATCTGGGAGCCCCGGACAGTCAATCACTATCTCATGTACTGGGACCTTAATAACTTTGT-  
GTCTTGGTATCAGCAGCAGCTGGCAAGGCACCAAGCTGGTCACTACGACGTCAACAAGCGGCCAAGTGGGGTGCCCGATAGATTACGCGGGTC-  
CAAATCTGGAATACAGCTTCACTGACTGTGAGCGGCCTCAGACTGACGATGAGGCAGTCTACTATTGCGGCTCCCTGGTGGGGAAGTGGGAC-  
GTCATTTTTGGCGGGGAAGTAAAGCTGACCGTGCTGCGGAGTGGCGGGGAGGCTCAGGAGGAGGAGGGAGCGGAGGAGGAGGCAGCCAG-  
CCTCAGCTCCAGGAGTCTGGCCAACTGGTGGAGGCATCCGAAACCTGTCTCTGACATGCGCCGTCAGCGGAGATTCCACTGCCGCTTGTA-  
ATAGCTTCTGGGGATGGGTGCGGCAGCCCCCTGAAAGGGCCTGGAATGGGTGCGGAGTCTGTCACACTGCGCCAGCTACTGGAACCGAGGATGG-  
ACATATCATAATCCCTCTGAAAAGTAGACTGACTCTGGCTCTGGACACCCCTAAGAACCTGGTGTTCCTGAAACTGAATAGCGTCACCGCAGCCGA-  
TACCGCCACATACTATTGTCTAGGTTTGGCGGGGAAGTGCTGCGCTACACAGACTGGCCTAAACCTGCTTGGGTGGATCTGTGGGAAGAGGAA-  
CACTGGTCACTGTGAGCTCC

10E8: TCTTATGAACTGACCCAGGAAACCGGAGTGAAGTGTGCTCTGGGGAGAACCCTGACCATTACATGCCGAGGAGATAGTCTGAGGAGTCAC-  
TATGCCTCCTGGTATCAGAAGAAGCCAGGCCAGGCCCTATCCTGCTGTTCTACGGCAAGAATAATCGCCCTCTGGCGTGCCAGACAGATTTTCG-  
GCTCTGCCAGCGGCAACAGGGCCTCTGACCATCTCTGGCGCGCAGGCCAGGACGATGCCGAGTATTACTGCAGCTCTAGGGATAAGAGCG-  
GCTCTAGACTGAGCGTGTTCGGCGGCGGCACCAAGCTGACAGTGTCTGGCGGCGGCGGCTCTGGCGGCGGCGGCTCCGGCGGCGGCGGCGCAGC-  
GAGGTGCAGCTGGTGGAGAGCGGCGGCGGCTGGTGAAGCCAGGCGGCTCTCTGAGGCTGTCTGTAGCGCTCTGGCTTTGACTTCGATAATG-  
CCTGGATGACCTGGGTGCGCCAGCCACTGGCAAGGGCCTGGAGTGGGTGGGCAGAATCACCGCCCCGGCGAGGGGCTGGAGCGTGGATTACGC-  
CGCCCCGTGGAGGGCAGATTCACCATCAGCAGACTGAACTCCATCAATTTCTGTACCTGGAGATGAATAACCTGAGGATGGAGGACTCTGGCCTG-  
TACTTTTGCGCCAGAACCGGCAAGTATTACGACTTTTGGAGCGGCTATCCACTGGAGAAGAATACTTTACAGATTGGGGGCGGGGAAGTCTGGTCA-  
CAGTCAGCAGT

### Supplemental References

1. Sather BD, Romano Ibarra GS, Sommer K, Curinga G, Hale M, Khan IF, *et al.* Efficient modification of CCR5 in primary human hematopoietic cells using a megaTAL nuclease and AAV donor template. *Sci Transl Med.* 2015;7(307):307ra156.
2. DeCamp A, Hraber P, Bailer RT, Seaman MS, Ochsenbauer C, Kappes J, *et al.* Global panel of HIV-1 Env reference strains for standardized assessments of vaccine-elicited neutralizing antibodies. *J Virol.* 2014;88(5):2489-2507
3. Li M, Gao F, Mascola JR, Stamatatos L, Polonis VR, Koutsoukos M, *et al.* Human immunodeficiency virus type 1 env clones from acute and early subtype B infections for standardized assessments of vaccine-elicited neutralizing antibodies. *J Virol.* 2005;79(16):10108-10124
4. Grier A, Burleigh S, Sahni J, Clough CA, Cardot V, Choe CC, *et al.* pEVL: A Linear Plasmid for Generating mRNA IVT Templates With Extended Encoded Poly(A) Sequences. *Mol Ther Nucl Ac.* 2016;(5):e306
